# Supplementary material for: Spin-crossover in cyanide-based bimetallic coordination polymers—insight from first-principles calculations
Source: Royal Society of Chemistry journal article supplement (doi:10.1039/c1jm11679g), 2011-01-01
Supplement: c1jm11679g.pdf [file c1jm11679g.pdf]

Supplementary Information

Spin-Crossover in Cyanide-Based Bimetallic  
Coordination Polymers – Insight from First-Principles  
Study

Soumyajit Sarkar, Kartick Tarafder, Peter M. Oppeneer and Tanusri Saha-Dasgupta

|          | 1Ag-HS-dh (2Ag-HS)   | 1Ag-LS-dh(2Ag-LS)    |
|----------|----------------------|----------------------|
| a        | 14.2138              | 11.9786              |
| b        | 13.3136              | 13.2460              |
| c        | 7.6334               | 8.8477               |
| $\alpha$ | 90.00                | 90.00                |
| $\beta$  | 92.311               | 96.915               |
| $\gamma$ | 90.00                | 90.00                |
| Ag1      | 0.2554 0.7533 0.2638 | 0.2422 0.7465 0.2464 |
| Ag2      | 0.2384 0.5660 0.0169 | 0.2531 0.5690 0.9913 |
| Fe1      | 0.0000 0.5000 0.5000 | 0.0000 0.5000 0.5000 |
| Fe2      | 0.5000 0.5000 0.5000 | 0.5000 0.5000 0.5000 |
| N1       | 0.0908 0.6040 0.3836 | 0.0699 0.6083 0.4048 |
| N2       | 0.0583 0.5471 0.7482 | 0.0729 0.5377 0.6960 |
| N3       | 0.8887 0.6186 0.5111 | 0.8660 0.5885 0.5246 |
| N4       | 0.7274 0.6709 0.4685 | 0.6650 0.5980 0.5108 |
| N5       | 0.5829 0.3994 0.3757 | 0.5765 0.3754 0.4129 |
| N6       | 0.4191 0.5217 0.2751 | 0.4458 0.5467 0.2758 |
| C1       | 0.1498 0.6600 0.3366 | 0.1236 0.6660 0.3407 |
| C2       | 0.1200 0.5602 0.8557 | 0.1295 0.5533 0.8134 |
| C3       | 0.9148 0.7153 0.5399 | 0.8734 0.6880 0.5610 |
| C4       | 0.8493 0.7931 0.5312 | 0.7771 0.7457 0.5708 |
| C5       | 0.7553 0.7673 0.4945 | 0.6728 0.6977 0.5456 |
| C6       | 0.7959 0.6012 0.4776 | 0.7614 0.5481 0.5004 |
| C7       | 0.6396 0.3439 0.3190 | 0.6375 0.3234 0.3503 |
| C8       | 0.3568 0.5375 0.1702 | 0.3805 0.5576 0.1648 |
| H1       | 0.9896 0.7286 0.5687 | 0.9579 0.7198 0.5811 |
| H2       | 0.8713 0.6293 0.0526 | 0.7840 0.6740 0.0979 |
| H3       | 0.7001 0.8245 0.4851 | 0.5937 0.7371 0.5536 |
| H4       | 0.2249 0.4770 0.5441 | 0.2447 0.5314 0.5293 |

Table 1: Theoretically optimized crystal structure of 1Ag-HS-dh and 1Ag-LS-dh compounds

|          | <b>2Cu</b> |        |         |
|----------|------------|--------|---------|
| a        | 11.4692    |        |         |
| b        | 13.3232    |        |         |
| c        | 8.0665     |        |         |
| $\alpha$ | 90.00      |        |         |
| $\beta$  | 95.10      |        |         |
| $\gamma$ | 90.00      |        |         |
| Cu1      | 0.2492     | 0.7509 | 0.2504  |
| Cu2      | 0.2516     | 0.5948 | -0.0015 |
| Fe1      | 0.0000     | 0.5000 | 0.5000  |
| Fe2      | 0.5000     | 0.5000 | 0.5000  |
| N1       | 0.0746     | 0.6073 | 0.3874  |
| N2       | 0.0723     | 0.5483 | 0.7094  |
| N3       | 0.8552     | 0.5884 | 0.5127  |
| N4       | 0.6447     | 0.5876 | 0.4897  |
| N5       | 0.5753     | 0.3932 | 0.3874  |
| N6       | 0.4291     | 0.5489 | 0.2901  |
| C1       | 0.1351     | 0.6678 | 0.3270  |
| C2       | 0.1344     | 0.5727 | 0.8293  |
| C3       | 0.8543     | 0.6906 | 0.5162  |
| C4       | 0.7490     | 0.7435 | 0.5011  |
| C5       | 0.6442     | 0.6898 | 0.4856  |
| C6       | 0.7502     | 0.5416 | 0.5016  |
| C7       | 0.6361     | 0.3331 | 0.3267  |
| C8       | 0.3678     | 0.5730 | 0.1692  |
| H1       | 0.9391     | 0.7278 | 0.5288  |
| H2       | 0.7483     | 0.8252 | 0.5012  |
| H3       | 0.5589     | 0.7260 | 0.4725  |
| H4       | 0.7506     | 0.4606 | 0.5024  |

Table 2: Theoretically optimized crystal structure of 2Cu compound
